1 **FIGL1 and its novel partner FLIP form a conserved complex that regulates**  
2 **homologous recombination.**

3

4 Joiselle Blanche Fernandes<sup>1</sup>, Marine Duhamel<sup>1</sup>, Mathilde Séguéla-Arnaud<sup>1</sup>, Nicole  
5 Froger<sup>1</sup>, Chloé Girard<sup>1</sup>, Sandrine Choinard<sup>1</sup>, Nancy De Winne<sup>2,3</sup>, Geert De Jaeger<sup>2,3</sup>,  
6 Kris Gevaert<sup>4,5</sup>, Raphael Guerois<sup>6</sup>, Rajeev Kumar<sup>1\*</sup> and Raphael Mercier<sup>1\*</sup>

7 1. Institut Jean-Pierre Bourgin, UMR1318 INRA-AgroParisTech, Université Paris-Saclay,  
8 RD10, 78000 Versailles, France.

9 <sup>2</sup>Department of Plant Biotechnology and Bioinformatics, Ghent University, Ghent,  
10 Belgium

11 <sup>3</sup>VIB Center for Plant Systems Biology, Ghent, Belgium

12 <sup>4</sup>Department of Biochemistry, Ghent University, Ghent, Belgium

13 <sup>5</sup>VIB Center for Medical Biotechnology, Ghent, Belgium

14 <sup>6</sup>. Institute for Integrative Biology of the Cell (I2BC), Commissariat à l'Energie Atomique  
15 et aux Energies Alternatives (CEA), Centre National de la Recherche Scientifique  
16 (CNRS), Université Paris-Sud, CEA-Saclay, F-91191 Gif-sur-Yvette, France

17 \* Corresponding authors: [raphael.mercier@inra.fr](mailto:raphael.mercier@inra.fr), [rajeev.kumar@inra.fr](mailto:rajeev.kumar@inra.fr)

18

19

20 **Abstract**

21 Homologous recombination is central to repair DNA double-strand breaks (DSB), either  
22 accidentally arising in mitotic cells or in a programmed manner at meiosis. Crossovers  
23 resulting from the repair of meiotic breaks are essential for proper chromosome  
24 segregation and increase genetic diversity of the progeny. However, mechanisms  
25 regulating CO formation remain elusive. Here, we identified through protein-protein  
26 interaction and genetic screens FIDGETIN-LIKE-1 INTERACTING PROTEIN (FLIP) as a  
27 new partner of the previously characterized anti-crossover factor FIDGETIN-LIKE-1  
28 (FIGL1) in *Arabidopsis thaliana*. We showed that FLIP limits meiotic crossover together  
29 with FIGL1. Further, FLIP and FIGL1 form a protein complex conserved from  
30 *Arabidopsis* to Human. FIGL1 interacts with the recombinases RAD51 and DMC1, the  
31 enzymes that catalyze the DNA strand exchange step of homologous recombination.  
32 *Arabidopsis flip* mutants recapitulates the *figl1* phenotype, with enhanced meiotic  
33 recombination associated with change in DMC1 dynamics. Our data thus suggest that  
34 FLIP and FIGL1 form a conserved complex that regulates the crucial step of strand  
35 invasion in homologous recombination.

36

37

38

39

40

41 Homologous recombination (HR) is critical for the repair of DNA double-strand breaks  
42 (DSBs) in both mitotic and meiotic cells<sup>1</sup>. Defects in HR repair causes genomic  
43 instability, leading to cancer predisposition and various inherited diseases in Humans<sup>2</sup>.  
44 During meiosis, HR promotes reciprocal exchange of genetic material between the  
45 homologous chromosomes by forming crossovers (COs). COs between the homologs  
46 constitute a physical link which is crucial for the accurate segregation of homologous  
47 chromosomes during meiosis<sup>3</sup>. COs also reshuffle parental genomes to enhance  
48 genetic diversity on which selection can act<sup>4</sup>. Failure or errors in HR at meiosis leads to  
49 sterility and aneuploidy, such as Down syndrome in humans<sup>5,6</sup>.

50 During meiosis, HR is initiated by the formation of numerous programmed DSBs  
51 catalyzed by the topoisomerase-like protein SPO11<sup>7</sup>. DSBs are resected to form 3'  
52 single-stranded DNA (ssDNA) overhangs. A central step of HR is the search and  
53 invasion of an intact homologous template by the broken DNA end, which is catalyzed  
54 by two recombinases, RAD51 and its meiosis-specific paralog DMC1<sup>8</sup>. Both  
55 recombinases polymerize on 3' ssDNA overhangs to form nucleoprotein filaments that  
56 can be cytologically observed as foci on chromosomes<sup>9,10</sup>. At this step, meiotic DSB  
57 repair encounters two possibilities to repair DSB by HR, either using the sister chromatid  
58 (inter-sister recombination) or using the homologous chromosomes (inter-homolog  
59 recombination).

60 The invasion and strand exchange of ssDNA displaces one strand of the template DNA,  
61 resulting in a three-stranded joint molecule (D-loops). D-loops are precursors for  
62 different pathways leading to either reciprocal exchange (CO) or non-reciprocal  
63 exchange (NCO) between the homologous chromosomes. Two pathways of COs

64 formation, classified as class I and class II, have been characterized, with variably  
65 relative importance in different species<sup>3</sup>. Class I COs are dependent on the activity of a  
66 group of protein collectively called ZMM (for Zip1-4, Msh4-5, Mer3)<sup>11</sup>, which stabilize D-  
67 loop intermediates to promote formation of the double-Holliday junction intermediates<sup>12</sup>.  
68 MLH1 and MLH3 in conjunction with EXO1 resolve double-Holliday junctions as class I  
69 COs<sup>13,14</sup>. Class I CO occurrence reduces the probability of another CO forming in the  
70 vicinity, a phenomenon termed as CO interference<sup>15</sup>. Additionally, recombination  
71 intermediates can be resolved by structure specific endonucleases including MUS81,  
72 producing class II COs, which are not subjected to interference<sup>16-18</sup>. In Arabidopsis,  
73 class I COs constitute 85-90% of COs, while remaining minority are class II CO<sup>19,20</sup>.  
74 Like in most eukaryotes, DSBs largely outnumber COs in Arabidopsis with a ratio of  
75 ~25:1<sup>21</sup>. This suggests that active mechanisms prevent DSBs from becoming CO.  
76 Accordingly, several anti-CO factors are identified in different species<sup>10,22-30</sup>.

77 Previously, our forward genetic screen identified FIDGETIN-LIKE-1 (FIGL1) as a  
78 negative regulator of meiotic COs in Arabidopsis<sup>10</sup>. Mutation in *FIGL1* in *Arabidopsis*  
79 increases meiotic CO frequency by 1.8-fold compared to wild type, and modifies the  
80 number and/or dynamics of RAD51/DMC1 foci. FIGL1 is widely conserved and is  
81 required for efficient HR in human somatic cells through a direct interaction with RAD51  
82<sup>31</sup>. Altogether, this suggests that FIGL1 is a conserved regulator of the strand invasion  
83 step of recombination, both in somatic and meiotic cells. FIGL1 belongs to the large  
84 family of AAA-ATPase proteins that are implicated in structural remodeling, unfolding  
85 and disassembly of proteins and oligomer complexes<sup>32,33</sup>.

86 Here, we identified a new factor limiting COs in Arabidopsis and that interacts directly  
87 with FIGL1, which we named FIDGETIN-LIKE-1 INTERACTING PROTEIN (FLIP). FLIP  
88 and its interaction with FIGL1 are conserved from plants to mammals, which suggests  
89 that the complex was present at the root of the eukaryotic tree. We further showed that  
90 *FLIP* and *FIGL1* act in the same pathway to negatively regulate meiotic CO formation,  
91 which appears to act on the regulation of the recombinase DMC1. Finally, we showed  
92 that both Arabidopsis and human FIGL1/FLIP complex interact with both RAD51 and  
93 DMC1. Overall, this study identified a novel conserved protein complex that regulates a  
94 crucial step of homologous recombination.

95

96 RESULTS

97 Identification of FIDGETIN-LIKE-1 Interacting Protein (FLIP), an evolutionarily conserved  
98 partner of FIGL1

99  
100 We previously identified FIDGETIN-LIKE-1 (FIGL1) as an anti-CO protein<sup>10</sup>. To better  
101 understand the role of FIGL1 during meiotic recombination, we searched for its  
102 interacting partners by tandem affinity purification coupled to mass spectrometry (TAP-  
103 MS) using overexpressed FIGL1 as a bait in *Arabidopsis* suspension culture cells<sup>34</sup>  
104 (Figure 1A). After filtering co-purified proteins for false positive (see M&M and<sup>34</sup>), we  
105 recovered, in two independent experiments, peptides from a single protein encoded by a  
106 gene of unknown function (*AT1G04650*), and therefore named it as FIDGETIN-LIKE-1  
107 INTERACTING PROTEIN (FLIP). Reciprocal TAP-MS experiments using FLIP as bait  
108 also recovered FIGL1 peptides, further suggesting that FLIP and FIGL1 belong to the  
109 same complex *in vivo* (Figure 1B). A direct interaction between FLIP and FIGL1 was  
110 further supported by yeast two hybrid (Y2H) assay using full length proteins (Figure 1C).  
111 To map the interaction domains, we truncated FIGL1 and FLIP proteins and tested their  
112 interaction in Y2H assays. N-terminal regions of FLIP (1-502 aminoacids) and of FIGL1  
113 (1-271 aminoacids), lacking the FRBD (FIGNL1's RAD51 binding domain) and the AAA-  
114 ATPase domain, were sufficient to mediate their interaction (Figure 1C). Further, the N  
115 terminal domain of FLIP was able to interact with itself, suggesting that it could  
116 oligomerize. Moreover, the human ortholog of FLIP (C1ORF112, hFLIP) and FIGL1  
117 (hFIGNL1) also showed interaction in our Y2H assays, suggesting that this interaction is  
118 evolutionarily conserved (Figure 1D). In addition, hFIGNL1 and C1ORF112 proteins

119 were previously showed to co-purify in pull-down assays<sup>31,35</sup> and mouse corresponding  
120 genes are strongly co-expressed<sup>36</sup>, further supporting that the FIGL1-FLIP interaction is  
121 conserved from plants to mammals. Mapping of the interaction domain on human  
122 proteins showed the N-terminal region (1-290 aminoacids) of FIGNL1 to mediate the  
123 interaction with hFLIP, consistent with the Arabidopsis data (Figure 1C and 1D). In  
124 addition, the FRBD of hFIGNL1 shows an interaction with hFLIP, suggesting that the  
125 FRBD domain could also participate to the interaction.

126  
127 The distribution of FLIP orthologs in eukaryotic species was analyzed using remote  
128 homology search strategy (see Methods). Orthologs of FLIP could be unambiguously  
129 detected in a wide range of species including mammalia, sauria and plants but also in  
130 arthropods and unicellular species such as choanoflagellate (*Salpingoeca rosetta*)  
131 (Figure 2 and as interactive tree <http://itol.embl.de/tree/132166555992271498216301>).  
132 The FLIP orthologs showed low conservation at the sequence level (e.g AtFLIP and  
133 hFLIP sharing only 12 % sequence identity), but they all harbor a specific DUF4487  
134 domain (Domain of Unknown Function)<sup>37</sup>, further supporting their orthology. No FLIP  
135 ortholog could be detected in alveolata, amoebzoa and fungi. FLIP1 systematically co-  
136 occur with FIGL1, which is consistent with FLIP supporting the function of FIGL1 (Figure  
137 2). The reverse is not true since there are a number of species with FIGL1 ortholog  
138 detected but no FLIP (as in *D. melanogaster* and *C. elegans*). Structural predictions  
139 using RaptorX server<sup>38</sup> and HHpred<sup>39</sup> do not converge toward the same predicted fold  
140 but are both in agreement with FLIP likely folding as a long helical bundle over its full  
141 sequence. Such folds are often seen in protein recognition scaffolds suggesting FLIP  
142 could act as a FIGL1 adaptor module. Given the wide range of species harboring both

143 FLIP and FIGL1 orthologs, the origin of this complex is probably quite ancient at the root  
144 of the eukaryotic tree suggesting that absence of FLIP/FIGL1 in eukaryotic species is  
145 due to independent gene loss events.

146

147 A genetic screen identified FLIP as an anti-CO factor

148 In parallel, *FLIP* was also recovered in a genetic screen aiming at identifying meiotic  
149 anti-CO factors that previously uncovered *FIGL1*. Using fertility (fruit length) as a proxy  
150 for CO formation, we screened for ethyl methane sulfonate-generated mutations that  
151 restored COs in class I CO deficient mutants (*zmm*). As COs provide a physical link  
152 between pairs of chromosomes (bivalents), mutation of an anti-CO factor is expected to  
153 restore bivalent formation in CO-deficient mutants, thus improving balanced  
154 chromosome segregation and fertility<sup>22</sup>. This genetic screen, led to the identification of  
155 several anti-CO factors, defining three pathways that limit COs in Arabidopsis: (i) The  
156 FANCM helicase and its cofactors<sup>22,23</sup>; (ii) The AAA-ATPase FIDGETIN-LIKE-1  
157 (*FIGL1*)<sup>10</sup>; (iii) The RECQ4 helicase-Topoisomerase 3 $\alpha$ -RMI1 complex<sup>24,25</sup>. Here, we  
158 isolated an additional suppressor of *hei10*, one of the *zmm* mutants that are deficient in  
159 class I CO<sup>40</sup>. This suppressor, *hei10(S)320* showed longer fruit length compared to  
160 *hei10* and bivalent formation was restored to an average of 3.7 bivalents per cell  
161 compared to 1.5 in *hei10*, and 5 in wild type (Figure 3), suggesting a partial restoration  
162 of CO formation. Whole genome sequencing and genetic mapping of *hei10(S)320*,  
163 defined a genetic interval containing five putative causal mutations. One of them  
164 resulted in a stop codon in the gene *AT1G04650*, which encodes FLIP (*flip-1*  
165 W305>STOP). An independent mutation in *FLIP* (T-DNA Salk 037387/ *flip-2*), was also



166 able to restore bivalent formation in *hei10* (Figure 3). Further, *flip-1/flip-2 hei10* exhibited  
167 restored bivalent (Figure 3), demonstrating that *flip-1* and *flip-2* are allelic and that  
168 mutations in *FLIP* are causal for the restoration of bivalents in *hei10*. The *flip-1* mutation  
169 was also able to restore bivalent formation in *msh5* (Figure 3), another essential gene of  
170 the class I CO pathway, suggesting that effect of the *flip* mutation is not specific to *hei10*  
171 but allows the formation COs in the absence of the class I pathway.

172 No growth or development defects were observed in the *flip* mutants. Meiosis  
173 progressed normally in single *flip-1* and *flip-2*, except that a pair of univalent was  
174 observed at metaphase in 17% of the cells (n=11/71 in *flip-1*; n=9/50 in *flip-2*). (Figure  
175 3B and C). This suggests a slight defect in implementation of the obligate COs in  
176 absence of *FLIP*. We next monitored the direct effect of *FLIP* mutation on CO frequency  
177 by tetrad analysis and measured recombination in six genetic intervals defined by  
178 fluorescent tagged markers that confer fluorescence in pollens<sup>41</sup>. CO frequency in *flip-1*  
179 was significantly increased in four intervals out of six tested, in the range of +15% to  
180 +40% compared to wild type (Figure 4). This increase in CO frequency due to loss of  
181 *FLIP* is consistent with the restoration of bivalent formation in *zmm* mutants, and implies  
182 that *FLIP* limits COs during meiosis in wild type. *FLIP* physically interacts with *FIGL1*  
183 (see above), suggesting that they can act together to limit COs. We therefore compared  
184 recombination in *flip-1*, *figl1-1* and the double mutant by tetrad analysis. On the four  
185 intervals tested, *figl1-1* showed an average of ~70% CO increase compared to wild type,  
186 corroborating previous findings (Figure 4), which is significantly higher than *flip-1*.  
187 Combining *flip-1* and *figl1-1* mutations, did not lead to a further increase in  
188 recombination suggesting that *FIGL1* and *FLIP* act in the same pathway to negatively

189 regulate CO formation (Figure 4). However, FIGL1 may be partially active in absence of  
190 FLIP as *flip-1* increases CO frequency to a lesser extent than *figl1-1*.

191

### 192 FLIP limits class II CO

193 We next explored the origin of extra COs in *flip*. In the *flip spo11-1* double mutant,  
194 bivalent were completely abolished and 10 univalents were observed at metaphase I,  
195 (Figure 3B), showing that all COs in *flip-1* are dependent on SPO11-1 induced DSBs.

196 Two classes of CO exist in *Arabidopsis*: class I CO are dependent on ZMM proteins and  
197 are subjected to interference, while class II are insensitive to interference and involve  
198 structure specific endonucleases including MUS81<sup>21</sup>. The *flip-1* mutation restored CO  
199 formation in two *zmm* mutants, *hei10* and *msh5* (see above). Further, tetrad analysis of  
200 three pairs of intervals showed reduced interference in *flip-1* compared to wild type  
201 (Figure 5A). Finally, we examined meiosis in *flip-1 mus81* double mutant. The *flip-1*  
202 *mus81* double mutant exhibited chromosome fragmentation at anaphase I, which is not  
203 observed in either single mutant (Figure 5B). This suggests that MUS81 is required for  
204 repair of recombination intermediates formed in *flip-1*. Altogether, the extra COs  
205 produced in *flip-1* appeared to be dependent on the Class II pathway, as previously  
206 shown for *figl1*.

207

### 208 Like FIGL1, FLIP negatively regulates DMC1 foci

209 Based on genetic and physical interactions between FIGL1 and FLIP, we next  
210 hypothesized that FLIP might regulate dynamics of DMC1 during meiosis, as previously  
211 shown for FIGL1<sup>10</sup>. In wild-type *Arabidopsis*, DMC1 foci first appear at zygotene and  
212 gradually all disappear at pachytene. In contrast, DMC1 foci persist in a fraction of

213 pachytene cells in *flip-1-1* (Figure 6A and 6B). This shows that the dynamics of DMC1 foci  
214 is modified in absence of *FLIP*, like in absence of *FIGL1*. Persistent DMC1 foci may  
215 represent unrepaired DSBs that are eventually repaired, as no chromosome  
216 fragmentation was observed at anaphase I (Figure 5B) in *flip-1* mutant.

217 One known positive regulator of DMC1 in plants is SDS, a meiosis-specific cyclin-like  
218 protein<sup>42,43</sup>. In absence of SDS, DMC1 foci do not form, synapsis and CO are abolished,  
219 but DSBs are formed and repaired presumably using the sister as template<sup>42,43</sup>. We  
220 previously showed that mutation in *FIGL1* restores DMC1 foci formation, synapsis, and  
221 bivalent formation in *sds*<sup>10</sup>. These results argued for antagonistic functions of SDS and  
222 *FIGL1*, the former positively and the later negatively regulating DMC1 foci formation and  
223 DMC1-mediated homolog engagement. Here, we similarly showed that DMC1 foci and  
224 synapsis are partially restored in *flip-1 sds* double mutant as compared to *sds* (Figure  
225 7A, 7B and 7C). Moreover 4.8 bivalents per metaphase I were observed in *flip-1 sds*  
226 (n=10) while their formation is almost completely abolished in *sds* (0.12 bivalents per  
227 metaphase I, n=50) (Figure 7D). Taken together, *FIGL1* and *FLIP* could antagonize SDS  
228 in the regulation of DMC1 foci formation and DMC1 mediated inter-homolog interactions.

229

### 230 The FLIP-FIGL1 complex interact with RAD51 and DMC1

231 Our genetic interaction and immunolocalization studies in Arabidopsis suggest that the  
232 *FIGL1/FLIP* complex might regulate the function of *RAD51* and *DMC1*, directly or  
233 indirectly. In addition, it was shown that human *FIGNL1* interacts with human *RAD51*  
234 through its *FIGNL1*'s *RAD51* binding domain (FRBD)<sup>31</sup>. Hence, we set out to examine  
235 whether Arabidopsis and human *FIGL1* and *FLIP* interact with *RAD51* and *DMC1*, using  
236 Y2H assays. Consistent with published data, the Y2H assay showed an interaction

237 between the FRBD domain of human FIGNL1 and RAD51 (Figure 8A). Similarly, we  
238 detected an interaction between Arabidopsis FIGL1 and RAD51, mediated by the  
239 predicted FRBD domain (Figure 8B). In addition, we observed a strong interaction  
240 between Arabidopsis FIGL1 and DMC1 as well as between the FRBD domain of the  
241 human FIGNL1 and DMC1 (Figure 8). This shows that FIGL1 can interact with both  
242 RAD51 and DMC1 and that these interactions are conserved in plants and mammals.  
243 Next, we tested interaction between FLIP and the two recombinases, with both plant and  
244 human proteins. Human FLIP interacted with DMC1, suggesting that FLIP could  
245 reinforce the interaction of the FIGL1-FLIP complex with DMC1. However, our Y2H  
246 assay did not reveal any interaction between Arabidopsis FLIP1 and DMC1. Altogether,  
247 our data argues that the FIGL1-FLIP complex could directly interact with RAD51 and  
248 DMC1.  
249  
250

251 Discussion:

252 Here, we identified by two different approaches FLIP as a new factor that genetically and  
253 physically interact with FIGL1<sup>10</sup> and regulates meiotic recombination. We showed that (i)  
254 FIGL1 and FLIP form a conserved complex; (ii) *FLIP* and *FIGL1* are anti-CO factors that  
255 act in the same pathway to regulate meiotic recombination; (iii) *FLIP* and *FIGL1* regulate  
256 DMC1 foci dynamics; (iv) *flip* and *figl1* restore DMC1 foci formation and DMC1 mediated  
257 inter-homolog interactions in the *sds* mutant; (v) FIGL1-FLIP complex interacts with  
258 RAD51 and DMC1, and this interaction is evolutionarily conserved in both plants and  
259 mammals. FIGL1 was previously shown to be involved in meiotic recombination in  
260 *Arabidopsis*, and in recombination-mediated DNA repair in human somatic cells<sup>31,44</sup>. In  
261 contrast and despite the conservation in many eukaryotes, FLIP was of unknown  
262 function. With this study, we propose a model wherein FIGL1 and FLIP act as a complex  
263 that negatively regulates the strand invasion step of HR by interacting with  
264 DMC1/RAD51 and modulating their activity/dynamics (Figure 9). FIGL1 belongs to the  
265 AAA-ATPase group of proteins, which typically function by dismantling the native folding  
266 of their target proteins<sup>32,33</sup>. Therefore, it is tempting to suggest that the FLIP/FIGL1  
267 complex may directly disrupt DMC1/RAD51 filaments using the unfoldase activity of  
268 FIGL1. Supporting this possibility, both *Arabidopsis* and human FIGL1 physically  
269 interacts with DMC1 and RAD51.

270 We showed that FLIP1 and FIGL1 act together to limit meiotic CO in *Arabidopsis*, but  
271 the increase in CO frequency is lower in *flip* than in *figl1* (~30% and ~70% increase  
272 compared to wild type, respectively). This difference in CO frequency could be attributed  
273 to the catalytic activity of the complex being supported by FIGL1. We suggest that FLIP

274 could only be partially required for FIGL1 enzymatic functions *in vivo*, acting as a co-  
275 factor or reinforcing the affinity and/or the specificity of the interaction of the FIGL1/FLIP  
276 complex with the target. In our assay, human FLIP interacted with DMC1, suggesting  
277 that FLIP could indeed function to facilitate FIGL1 activity towards DMC1. We could not  
278 detect an interaction between FLIP and RAD51, but we cannot rule out the possibility  
279 that FLIP facilitates also interaction of the complex with RAD51. Indeed, several lines of  
280 evidence suggest that FLIP could act in conjunction with FIGL1 in its role in somatic HR  
281 <sup>31</sup>: Down-regulation of *hFLIP* induces reduced growth of HeLa cells <sup>36</sup>. *FLIP* in mouse is  
282 strongly co-expressed with cancer related genes and the knock out mouse is not  
283 viable<sup>36,45</sup>. Finally, *FIGNL1* and *hFLIP* are strongly co-regulated in mouse expression  
284 data <sup>36</sup>. Overall, this argues for a conserved role of the FIGL1/FLIP complex in  
285 regulating RAD51/DMC1 activities during both somatic and meiotic HR.

286 Beyond Arabidopsis and humans, *FIGL1* and *FLIP* are conserved in all vertebrates and  
287 land plants we examined. FIGL1 and FLIP can be also detected in species from other  
288 distant clades, suggesting that this complex emerged early in the evolution of  
289 eukaryotes (Figure 2). However, some clades appear to have lost both *FIGL1* and *FLIP*,  
290 most notably the *Alveolata* and *Dikarya* (which regroups the fungi *Basidiomycetes* and  
291 *Ascomycetes*). In those species, the RAD51/DMC1 activity might be regulated  
292 independently of *FIGL1/FLIP1*. Species with a *FLIP* ortholog also systematically have a  
293 *FIGL1*, but the reverse is not true, several species/clades having FIGL1 but no  
294 detectable *FLIP orthologs*. This is consistent with our experimental data that argue for  
295 FIGL1 being the core activity of the complex and FLIP as a dispensable factor for FIGL1  
296 activity. While *RAD51* appears to be universally conserved, DMC1 is absent in a number

297 of species (Figure 2). Moreover, we could not find any correlation between  
298 presence/absence of *FIGL1* or *FLIP* with *DMC1*. Some species have *DMC1* but no  
299 *FIGL1/FLIP* (e.g many fungi), while others have *DMC1* and *FIGL1* but not *FLIP* (e.g  
300 some nematodes), or *FIGL1* and *FLIP* without *DMC1* (e.g *Chrophyta*). Altogether, our  
301 phylogenic analysis supports that neither *FIGL1* nor *FLIP* are specific to *DMC1*, and that  
302 the *FIGL1-FLIP* complex can regulate the activity of both *RAD51* and *DMC1*. The *FIGL1*  
303 complex may also have additional functions unrelated to HR<sup>46</sup>.

304 We suggest that *FIGL1* and *FLIP* could limit strand invasion mediated by *RAD51* and  
305 *DMC1* (Figure 9). How the lack of this function could lead to an increase in the  
306 frequency of meiotic CO as observed in *flip* and *figl1*? One possible explanation is that  
307 the absence of *FLIP* and *FIGL1* changes the equilibrium between invasions on inter-  
308 sister versus inter-homolog, leading to the formation of higher numbers of inter-  
309 homologs joint molecule and eventually more COs. However, DSBs and presumably  
310 inter-homologous joint molecules are already in large excess to COs in wild type<sup>21</sup>,  
311 making hard to believe that a simple increase in their number would increase CO  
312 frequency. Another non-exclusive possibility is that lack of the *FLIP* / *FIGL1* activity  
313 generates aberrant recombination intermediates through either multi-invasions or  
314 invasion of both ends of a break. The result that the structure specific nuclease *MUS81*  
315 becomes essential for completion of repair in *figl1* and *flip1*, suggest that indeed some  
316 novel class of intermediates arise in these mutants. Thus, we favor the hypothesis that  
317 in absence of *FLIP* and *FIGL1* aberrant joint molecules such as multi-chromatid joint  
318 molecules<sup>47,48</sup> are formed and need structure specific endonuclease to be resolved,  
319 leading to increased COs. Therefore, the function of *FLIP/FIGL1* in wild type context

320 could prevent formation of aberrant recombination intermediates by functioning as  
321 quality control of strand invasion.

322 In conclusion, we uncovered a conserved FLIP-FIGL1 complex that directly binds to  
323 RAD51/DMC1 and could negatively regulate strand invasion during homologous  
324 recombination. It would be of particular interest to further study the function of this  
325 complex in mammalian systems and in biochemical assays. Unraveling proteins playing  
326 a role in HR pathway would provide better understanding related to various inherited  
327 diseases in humans pertaining to defects in HR repair proteins <sup>2</sup>. Targeting HR protein,  
328 could increase the sensitivity of cancer cells to anti-cancer drugs <sup>49</sup>. Thus, FLIP-FIGL1  
329 could represent potential targets for cancer therapy.

330

331

332

333

334

335

336

337



338 Materials and Methods:

339 Genetic material: The Arabidopsis lines used in this study were : *hei10-2* (N514624)<sup>40</sup>,  
340 *msh5-2* (N526553)<sup>50</sup>, *mus81-2* (N607515)<sup>18</sup>, *spo11-1-3* (N646172)<sup>51</sup>, *sds-2*  
341 (N806294)<sup>42</sup>, *figl1-1*<sup>10</sup>, *zip4-2* (N568052)<sup>52</sup>. Tetrad analysis lines (FTLs) used were as  
342 follows: I2ab (FTL1506/FTL1524/FTL965/*qrt1-2*), I3bc  
343 (FTL1500/FTL3115/FTL1371/*qrt1-2*) and I5cd (FTL1143/FTL1963/FTL2450/*qrt1-2*).  
344 FTLs were obtained from Gregory Copenhaver<sup>41</sup>. Suppressor *hei10(s)320/flip-1* was  
345 sequenced using illumina technology at the Genome Analysis Centre, Norwich, UK.  
346 Mutations were identified through MutDetect pipeline<sup>23</sup>. The *flip1-1* causal mutation was  
347 C to T substitution at the position chr1:1297137 (Col-0 TAIR10 assembly). *flip-2*  
348 (N662136) T-DNA mutant was obtained from the Salk collection and distributed by the  
349 NASC. The primers used for genotyping are listed in the table S4.

350  
351  
352 Cytology techniques: Meiotic chromosome from anthers were spread and DAPI stained  
353 as previously described<sup>53</sup>. Immunostaining of male meiotic chromosome spreads was  
354 performed as described in Armstrong *et al*<sup>54</sup>. For Immunofluorescence, primary  
355 antibodies were : anti-DMC1 (1:20)<sup>55</sup>, anti-ZYP1 (1:250)<sup>56</sup> and anti-ASY1 (1:250)<sup>54</sup>.  
356 Secondary antibody Alexa fluor®488 (A-11006); Alexa fluor®568 (A-11077); Alexa  
357 fluor®568 (A-11075) and super clonal Alexa fluor®488, (A-27034) obtained from  
358 Thermo Fisher Scientific were used in 1:250 dilution. Images were obtained using a  
359 Zeiss AxioObserver microscope and were analyzed by Zeiss Zen software. In case of  
360 DMC1 staining, data was acquired with 1000 ms exposure and DMC1 foci were

361 manually counted. Scatter dot plots and statistical analysis were performed using the  
362 software GraphPad Prism 6.

363

#### 364 Recombination measurement:

365 We used FTLs<sup>41</sup> to estimate male meiotic recombination rates at six different genetic  
366 intervals I2ab, I5cd and I3bc. For each set of experiment heterozygous plants were  
367 generated for the pairs of linked fluorescent marker and siblings from the same  
368 segregating progeny were used compared recombination frequency between different  
369 genotypes. Slides were prepared as described previously<sup>41</sup>. Tetrads were counted and  
370 sorted to specific classes (A to L)<sup>41</sup> using a pipeline developed on the Metafer Slide  
371 Scanning Platform. For each tetrad, attribution to a specific class was double checked  
372 manually. Genetic sizes of each interval was calculated using Perkins equation<sup>57</sup> as  
373 follows:  $D=100 \times (\text{Tetratype frequency} + 6 \times \text{Non Parental Ditype frequency}) / 2$  in cM. The  
374 Interference ratio (IR) was measured as described previously<sup>58 41</sup>. Briefly, in two  
375 adjacent intervals I1 and I2, genetic size of I1 was calculated for the two populations of  
376 tetrads in I2 interval – D1 is at least with one CO in I2; D2 is without CO in I2. The ratio  
377 of D1/D2 revealed presence (when  $IR < 1$ ) or absence (when IR is close to 1 or  $> 1$ ) of the  
378 interference. A chi square test is performed to test the null hypothesis ( $H_0: D1=D2$ ). The  
379 average of the two reciprocals is depicted on the graph (Figure 4A).

380

#### 381 Cloning:

382 Cloning of the *FIGL1* open reading frame (ORF) is described in <sup>10</sup> . The *AtFLIP* ORF  
383 was amplified using gene-specific primer (Table S4) on cDNA prepared from  
384 Arabidopsis flower buds (Col-0 accession). The full length or truncated ORFs of *FLIP*  
385 were cloned into pDONR207/pDONR201 vectors to produce entry clones. All plasmid  
386 inserts were verified by Sanger sequencing. The ORFs for human FIGNL1 (BC051867),  
387 RAD51 (BC001459), DMC1 (BC125163) were obtained from the human orfeome  
388 collection, while human FLIP (IMAGE clone: 30389801) ORF was ordered from Source  
389 BioScience, UK

390

391 Protein-Protein Interaction:

392

393 Yeast two hybrid assay:

394

395 For yeast two hybrid assays, *AtFIGL1*, *AtFLIP*, *AtRAD51* and *AtDMC1* as well as their  
396 respective human orthologs (*hFignl1*, *hFlip*, *hRad51*, *hDmc1*) were cloned into  
397 destination vectors pGBKT7 and pGADT7 by the Gateway technology. The fidelity of  
398 coding sequence of all clones was verified by sequencing. Yeast two hybrid assays were  
399 carried out using GAL4 based system (Clontech)<sup>59</sup> by introducing plasmids harboring  
400 gene of interest in Yeast strains AH109 and Y187 and interaction were tested as  
401 previously described <sup>60</sup>.

402

403 Tandem Affinity Purification coupled with Mass Spectrometry (TAP-MS):

404 TAP-MS analysis was performed as described previously<sup>34</sup>. Briefly, the plasmids  
405 expressing FLIP or FIGL1 fused to the double affinity GS<sup>rhino</sup> tag<sup>34</sup> were transformed into  
406 *Arabidopsis* (Ler) cell-suspension cultures. TAP purifications were performed with 200  
407 mg of total protein extract as input and interacting proteins were identified by mass  
408 spectrometry using an LTQ Orbitrap Velos mass spectrometer.. Proteins with at least  
409 two high-confidence peptides were retained only if reproducible in two experiments.  
410 Non-specific proteins were filtered out based on their frequency of occurrence in a large  
411 dataset of TAP experiments with many different and unrelated baits as described<sup>34</sup>.

#### 412 Bioinformatics:

413 Identification of putative orthologs of FLIP, FIGL1, DMC1 and RAD51 was performed  
414 following different strategies based on the sequence divergence and the existence of  
415 paralogs. Since FLIP sequence diverged significantly during evolution without detectable  
416 paralog, 3 iterations of hhblits<sup>61,62</sup> against the uniclust30\_2017\_04 database were  
417 sufficient to retrieve 139 sequences belonging to plants and metazoa species. To get  
418 NCBI entries of those proteins, a PSSM generated from the recovered alignment was  
419 used as input of a jump start PSI-blast<sup>63</sup> against the eukaryotic refseq\_protein  
420 database<sup>64</sup>. For DMC1 and RAD51, reciprocal best hits of blast searches were used to  
421 identify the most likely ortholog in every species. First, DMC1 in *H. sapiens* and *S.*  
422 *cerevisiae* sequences were blasted against the refseq\_protein database to gather a set  
423 of DMC1 candidates. Each of these candidates was reciprocally blasted against the  
424 protein sequences of six fully sequenced genomes wherein DMC1 and RAD51 genes  
425 could be unambiguously identified and which were chosen spread over the phylogenetic  
426 tree (*H. sapiens*, *S. cerevisiae*, *C. reinhardtii*, *T. gondii*, *P. falciparum*, *T. cruzi*).

427 Detection of a DMC1 ortholog was considered correct when one of the 6 DMC1 genes  
428 was spotted out as best hit with an alignment score at least 10% higher than that of the  
429 second best hit, supporting its significantly higher similarity to DMC1 than to RAD51.  
430 The same strategy was followed to assign RAD51 orthologs. In the case of FIGL1, large  
431 number of paralogs such as spastin, fidgetin, katanin or sap1-like proteins render the  
432 global analysis more complex. A phylogenetic tree was initially built focused on the AAA  
433 ATPase domain of 600 protein sequences belonging to fidgetin, spastin, katanin, sap1  
434 and VPS4 families. They were aligned using mafft einsl algorithm<sup>65</sup> and tree was built  
435 with PhyML<sup>64</sup> using the LG model for aminoacid substitution and 4 categories in the  
436 discrete gamma model. This prior analysis helped to delineate which homologs could be  
437 considered as orthologs of *H. sapiens* and *A. thaliana* FIDGETIN-like proteins. For the  
438 373 fully sequenced species presented in Figure 2, reciprocal blast best hit searches  
439 were then performed to retrieve the Fidgetin-like ortholog when present. FIGL1 ortholog  
440 candidates were retrieved from a blast of *H. sapiens* and *A. thaliana* FIGL1 sequences  
441 against the refseq\_protein database and were assessed by reciprocal best hit searches  
442 using these candidates as query against genomes of *H. sapiens* and *A. thaliana*.  
443 Detection of FIGL1 orthology was assessed if best hit was FIGL1 sequence with an  
444 alignment score at least 10% higher than that of the second best hit. For a limited  
445 number of species, orthologs were suspected but not identified in any of the NCBI  
446 database. Targeted blast searches were then performed on their genomes using the  
447 Joint Genome Institute (JGI) server to further probe the existence of these orthologs  
448 which could be detected in 7 cases. All the NCBI and JGI gene entries are listed in table  
449 S2 and can be easily retrieved from the interactive tree

450 (<http://itol.embl.de/tree/132166555992271498216301>)<sup>66</sup> by passing the mouse over the

451 species names.

452

453 Acknowledgments

454 We are grateful to Christine Mézard for critical reading of the manuscript. We thank  
455 Gregory Copenhaver for providing the FTL lines. This work was funded by the European  
456 Research Council Grant ERC 2011 StG 281659 (MeioSight), the Schlumberger  
457 foundation for education and research (FSER) and the Simone et Cino del DUCA  
458 foundation/Institut de France.

459

460

461

462

463 1. Heyer, W. D., Ehmsen, K. T. & Liu, J. Regulation of homologous recombination in  
464 eukaryotes. *Annu. Rev. Genet.* **44**, 113–39 (2010).

465 2. Reliene, R., Bishop, A. J. R. & Schiestl, R. H. Involvement of Homologous  
466 Recombination in Carcinogenesis. *Adv. Genet.* **58**, 67–87 (2007).

467 3. Gray, S. & Cohen, P. E. Control of Meiotic Crossovers: From Double-Strand Break  
468 Formation to Designation. *Annu. Rev. Genet.* 1–36 (2016). doi:10.1146/annurev-  
469 genet-120215-035111

470 4. Hadany, L. & Comeron, J. M. Why are sex and recombination so common? *Ann.*  
471 *N. Y. Acad. Sci.* **1133**, 26–43 (2008).

472 5. Herbert, M., Kalleas, D., Cooney, D., Lamb, M. & Lister, L. Aneuploid Oocytes and  
473 Trisomy Births. **35**, 1–20 (2015).

474 6. Handel, M. A. & Schimenti, J. C. Genetics of mammalian meiosis: regulation,  
475 dynamics and impact on fertility. *Nat. Rev. Genet.* **11**, 124–36 (2010).

476 7. de Massy, B. Initiation of meiotic recombination: how and where? Conservation  
477 and specificities among eukaryotes. *Annu. Rev. Genet.* **47**, 563–99 (2013).

478 8. Brown, M. S. & Bishop, D. K. DNA Strand Exchange and RecA Homologs in  
479 Meiosis. *Cold Spring Harb. Perspect. Biol.* (2014).

480 doi:10.1101/cshperspect.a016659

481 9. Brown, M. S., Grubb, J., Zhang, A., Rust, M. J. & Bishop, D. K. Small Rad51 and



- 482 Dmc1 Complexes Often Co-occupy Both Ends of a Meiotic DNA Double Strand  
483 Break. *PLoS Genet.* **11**, (2015).
- 484 10. Girard, C. *et al.* AAA-ATPase FIDGETIN-LIKE 1 and Helicase FANCM Antagonize  
485 Meiotic Crossovers by Distinct Mechanisms. *PLoS Genet.* **11**, e1005369 (2015).
- 486 11. Börner, G. V., Kleckner, N. E. & Hunter, N. Crossover/noncrossover differentiation,  
487 synaptonemal complex formation, and regulatory surveillance at the  
488 leptotene/zygotene transition of meiosis. *Cell* **117**, 29–45 (2004).
- 489 12. Hunter, N. Meiotic Recombination: The Essence of Heredity. *Cold Spring Harb.*  
490 *Perspect. Biol.* **7**, 1–35 (2015).
- 491 13. Zakharyevich, K., Tang, S., Ma, Y. & Hunter, N. Delineation of joint molecule  
492 resolution pathways in meiosis identifies a crossover-specific resolvase. *Cell* **149**,  
493 334–47 (2012).
- 494 14. Ranjha, L., Anand, R. & Cejka, P. The *Saccharomyces cerevisiae* Mlh1-Mlh3  
495 heterodimer is an endonuclease that preferentially binds to holliday junctions. *J.*  
496 *Biol. Chem.* **289**, 5674–5686 (2014).
- 497 15. Wang, S., Zickler, D., Kleckner, N. E. & Zhang, L. Meiotic crossover patterns:  
498 Obligatory crossover, interference and homeostasis in a single process. *Cell Cycle*  
499 **14**, 305–314 (2015).
- 500 16. Gaskell, L. J., Osman, F., Gilbert, R. J. C. & Whitby, M. C. Mus81 cleavage of  
501 Holliday junctions: a failsafe for processing meiotic recombination intermediates?  
502 *EMBO J.* **26**, 1891–901 (2007).

- 503 17. de Los Santos, T. *et al.* The Mus81/Mms4 endonuclease acts independently of  
504 double-Holliday junction resolution to promote a distinct subset of crossovers  
505 during meiosis in budding yeast. *Genetics* **164**, 81 (2003).
- 506 18. Berchowitz, L. E., Francis, K. E., Bey, A. L. & Copenhaver, G. P. The role of  
507 AtMUS81 in interference-insensitive crossovers in *A. thaliana*. *PLoS Genet.* **3**,  
508 e132 (2007).
- 509 19. Macaisne, N., Vignard, J. & Mercier, R. SHOC1 and PTD form an XPF-ERCC1-  
510 like complex that is required for formation of class I crossovers. *J. Cell Sci.* **124**,  
511 2687–91 (2011).
- 512 20. Higgins, J. D., Buckling, E. F., Franklin, F. C. H. & Jones, G. H. Expression and  
513 functional analysis of AtMUS81 in Arabidopsis meiosis reveals a role in the  
514 second pathway of crossing-over. *Plant J.* **54**, 152–62 (2008).
- 515 21. Mercier, R., Mezard, C., Jenczewski, E., Macaisne, N. & Grelon, M. The molecular  
516 biology of meiosis in plants. *Annu. Rev. Plant Biol.* **66**, 297–327 (2015).
- 517 22. Crismani, W. *et al.* FANCM Limits Meiotic Crossovers. *Science (80-. )*. **336**, 1588–  
518 1590 (2012).
- 519 23. Girard, C. *et al.* FANCM-associated proteins MHF1 and MHF2, but not the other  
520 Fanconi anemia factors, limit meiotic crossovers. *Nucleic Acids Res.* **42**, 9087–  
521 9095 (2014).
- 522 24. Séguéla-Arnaud, M. *et al.* Multiple mechanisms limit meiotic crossovers: TOP3 $\alpha$   
523 and two BLM homologs antagonize crossovers in parallel to FANCM. *Proc. Natl.*

- 524 *Acad. Sci. U. S. A.* **112**, 4713–4718 (2015).
- 525 25. Séguéla-Arnaud, M. *et al.* RMI1 and TOP3 $\alpha$  limit meiotic CO formation through  
526 their C-terminal domains. *Nucleic Acids Res.* **45**, 1860–1871 (2017).
- 527 26. Lorenz, A. *et al.* The fission yeast FANCM ortholog directs non-crossover  
528 recombination during meiosis. *Science* **336**, 1585–8 (2012).
- 529 27. Youds, J. L. *et al.* RTEL-1 enforces meiotic crossover interference and  
530 homeostasis. *Science (80-. )*. **327**, 1254–8 (2010).
- 531 28. De Muyt, A. *et al.* BLM Helicase Ortholog Sgs1 Is a Central Regulator of Meiotic  
532 Recombination Intermediate Metabolism. *Mol. Cell* **46**, 43–53 (2012).
- 533 29. Tang, S., Wu, M. K. Y., Zhang, R. & Hunter, N. Pervasive and Essential Roles of  
534 the Top3-Rmi1 Decatenase Orchestrate Recombination and Facilitate  
535 Chromosome Segregation in Meiosis. *Mol. Cell* **57**, 607–621 (2015).
- 536 30. Kaur, H., De Muyt, A. & Lichten, M. Top3-Rmi1 DNA Single-Strand Decatenase Is  
537 Integral to the Formation and Resolution of Meiotic Recombination Intermediates.  
538 *Mol. Cell* **57**, 583–594 (2015).
- 539 31. Yuan, J. & Chen, J. FIGNL1-containing protein complex is required for efficient  
540 homologous recombination repair. *Proc. Natl. Acad. Sci. U. S. A.* **110**, 10640–5  
541 (2013).
- 542 32. Hanson, P. I. & Whiteheart, S. W. AAA+ proteins: have engine, will work. *Nat.*  
543 *Rev. Mol. Cell Biol.* **6**, 519–529 (2005).

- 544 33. White, S. R. & Lauring, B. AAA+ ATPases: Achieving diversity of function with  
545 conserved machinery. *Traffic* **8**, 1657–1667 (2007).
- 546 34. Van Leene, J. *et al.* An improved toolbox to unravel the plant cellular machinery by  
547 tandem affinity purification of Arabidopsis protein complexes. *Nat Protoc* **10**, 169–  
548 187 (2015).
- 549 35. Hein, M. Y. *et al.* A Human Interactome in Three Quantitative Dimensions  
550 Organized by Stoichiometries and Abundances. *Cell* **163**, 712–723 (2015).
- 551 36. van Dam, S. *et al.* GeneFriends: an online co-expression analysis tool to identify  
552 novel gene targets for aging and complex diseases. *BMC Genomics* **13**, 535  
553 (2012).
- 554 37. Marchler-Bauer, A. *et al.* CDD: NCBI's conserved domain database. *Nucleic Acids*  
555 *Res.* **43**, D222-6 (2015).
- 556 38. Källberg, M. *et al.* Template-based protein structure modeling using the RaptorX  
557 web server. *Nat. Protoc.* **7**, 1511–22 (2012).
- 558 39. Söding, J. Protein homology detection by HMM-HMM comparison. *Bioinformatics*  
559 **21**, 951–60 (2005).
- 560 40. Chelysheva, L. *et al.* The Arabidopsis HEI10 is a new ZMM protein related to Zip3.  
561 *PLoS Genet.* **8**, e1002799 (2012).
- 562 41. Berchowitz, L. E. & Copenhaver, G. P. Fluorescent Arabidopsis tetrads: a visual  
563 assay for quickly developing large crossover and crossover interference data sets.  
564 *Nat. Protoc.* **3**, 41–50 (2008).

- 565 42. De Muyt, A. *et al.* A high throughput genetic screen identifies new early meiotic  
566 recombination functions in *Arabidopsis thaliana*. *PLoS Genet.* **5**, e1000654 (2009).
- 567 43. Azumi, Y. *et al.* Homolog interaction during meiotic prophase I in *Arabidopsis*  
568 requires the SOLO DANCERS gene encoding a novel cyclin-like protein. *EMBO J.*  
569 **21**, 3081–3095 (2002).
- 570 44. Ma, J. *et al.* FIGNL1 is overexpressed in small cell lung cancer patients and  
571 enhances NCI-H446 cell resistance to cisplatin and etoposide. *Oncol. Rep.* **37**,  
572 1935–1942 (2017).
- 573 45. Morgan, H. *et al.* EuroPhenome: A repository for high-throughput mouse  
574 phenotyping data. *Nucleic Acids Res.* **38**, D577–D585 (2009).
- 575 46. Luke-Glaser, S., Pintard, L., Tyers, M. & Peter, M. The AAA-ATPase FIGL-1  
576 controls mitotic progression, and its levels are regulated by the CUL-3MEL-26 E3  
577 ligase in the *C. elegans* germ line. *J. Cell Sci.* **120**, 3179–87 (2007).
- 578 47. Jessop, L. & Lichten, M. Mus81/Mms4 Endonuclease and Sgs1 Helicase  
579 Collaborate to Ensure Proper Recombination Intermediate Metabolism during  
580 Meiosis. *Mol. Cell* **31**, 313–323 (2008).
- 581 48. Oh, S. D., Lao, J. P., Taylor, A. F., Smith, G. R. & Hunter, N. RecQ Helicase,  
582 Sgs1, and XPF Family Endonuclease, Mus81-Mms4, Resolve Aberrant Joint  
583 Molecules during Meiotic Recombination. *Mol. Cell* **31**, 324–336 (2008).
- 584 49. Bryant, H. E. *et al.* Specific killing of BRCA2-deficient tumours with inhibitors of  
585 poly(ADP-ribose) polymerase. *Nature* **434**, 913–7 (2005).

- 586 50. Higgins, J. D. *et al.* AtMSH5 partners AtMSH4 in the class I meiotic crossover  
587 pathway in *Arabidopsis thaliana*, but is not required for synapsis. *Plant J.* **55**, 28–  
588 39 (2008).
- 589 51. Stacey, N. J. *et al.* *Arabidopsis* SPO11-2 functions with SPO11-1 in meiotic  
590 recombination. *Plant J.* **48**, 206–16 (2006).
- 591 52. Chelysheva, L. *et al.* Zip4/Spo22 is required for class I CO formation but not for  
592 synapsis completion in *Arabidopsis thaliana*. *PLoS Genet.* **3**, e83 (2007).
- 593 53. Ross, K. J., Fransz, P. & Jones, G. H. A light microscopic atlas of meiosis in  
594 *Arabidopsis thaliana*. *Chromosom. Res.* **4**, 507–16 (1996).
- 595 54. Armstrong, S. J., Caryl, A. P. P., Jones, G. H. & Franklin, F. C. H. Asy1, a protein  
596 required for meiotic chromosome synapsis, localizes to axis-associated chromatin  
597 in *Arabidopsis* and *Brassica*. *J. Cell Sci.* **115**, 3645–3655 (2002).
- 598 55. Vignard, J. *et al.* The Interplay of RecA-related Proteins and the MND1 – HOP2  
599 Complex during Meiosis in *Arabidopsis thaliana*. **3**, (2007).
- 600 56. Higgins, J. D., Sanchez-Moran, E., Armstrong, S. J., Jones, G. H. & Franklin, F. C.  
601 H. The *Arabidopsis* synaptonemal complex protein ZYP1 is required for  
602 chromosome synapsis and normal fidelity of crossing over. *Genes Dev.* **19**, 2488–  
603 2500 (2005).
- 604 57. Perkins, D. D. Biochemical Mutants in the Smut Fungus *Ustilago Maydis*. *Genetics*  
605 **34**, 607–26 (1949).
- 606 58. Malkova, A. *et al.* Gene conversion and crossing over along the 405-kb left arm of

- 607            *Saccharomyces cerevisiae* chromosome VII. *Genetics* **168**, 49–63 (2004).
- 608    59.    Rossignol, P., Collier, S., Bush, M., Shaw, P. & Doonan, J. H. Arabidopsis POT1A  
609            interacts with TERT-V(I8), an N-terminal splicing variant of telomerase. *J. Cell Sci.*  
610            **120**, 3678–3687 (2007).
- 611    60.    Kumar, R., Bourbon, H.-M. & de Massy, B. Functional conservation of Mei4 for  
612            meiotic DNA double-strand break formation from yeasts to mice. *Genes Dev.* **24**,  
613            1266–80 (2010).
- 614    61.    Alva, V., Nam, S.-Z., Söding, J. & Lupas, A. N. The MPI bioinformatics Toolkit as  
615            an integrative platform for advanced protein sequence and structure analysis.  
616            *Nucleic Acids Res.* **44**, W410-5 (2016).
- 617    62.    Remmert, M., Biegert, A., Hauser, A. & Söding, J. HHblits: lightning-fast iterative  
618            protein sequence searching by HMM-HMM alignment. *Nat. Methods* **9**, 173–5  
619            (2011).
- 620    63.    Altschul, S. F. *et al.* Gapped BLAST and PSI-BLAST: a new generation of protein  
621            database search programs. *Nucleic Acids Res.* **25**, 3389–402 (1997).
- 622    64.    NCBI Resource Coordinators. Database resources of the National Center for  
623            Biotechnology Information. *Nucleic Acids Res.* **44**, D7-19 (2016).
- 624    65.    Katoh, K. & Standley, D. M. MAFFT multiple sequence alignment software version  
625            7: improvements in performance and usability. *Mol. Biol. Evol.* **30**, 772–80 (2013).
- 626    66.    Letunic, I. & Bork, P. Interactive tree of life (iTOL) v3: an online tool for the display  
627            and annotation of phylogenetic and other trees. *Nucleic Acids Res.* **44**, W242-5

628 (2016).

629

630

631

632



633 Figure legends

634

635 **Figure 1** : *Arabidopsis* and Humans FLIP and FIGL1 interact with each other through N-  
636 terminal .

637 A-B. Represents purified proteins in two replicates of tandem affinity purifications  
638 followed by mass spectrometry, performed using *Arabidopsis* FIGL1 (A) or FLIP (B) as a  
639 bait, over-expressed in *Arabidopsis* cultured cells. For filtering aspecific and false  
640 positive interactors, we refer to M&M and <sup>34</sup>. The number of peptides and the fraction of  
641 the protein covered are indicated for each hit. Detailed information is present in Table  
642 S1.

643 C. *Arabidopsis* FLIP-FIGL1 interact using yeast two hybrid assay. Schematic  
644 representation of full length and truncated proteins. Position of the truncation and the  
645 known domain are indicated. The two protein of interest are fused with GAL4 DNA  
646 binding domain (BD) and with GAL4 activation domain (AD), respectively. Diploid strains  
647 are selected on medium lacking LW amino acids. Protein interactions were observed by  
648 selecting diploids grown on medium stringency media lacking LWH or in high stringency  
649 medium lacking LWHA. Controls empty AD and BD vector are shown. Serial dilutions  
650 are indicated in the order 1, 10, 100, 1000. Combinations of fusion proteins not tested  
651 are indicated as not determined (n.d).

652 D. Humans FLIP-FIGL1 interact in yeast two hybrid assay. Legend as in C.

653

654 **Figure 2.** Phylogenetic tree depicting the evolutionary conservation of FLIP, FIGL1,  
655 RAD51 and DMC1 orthologs in a range of eukaryotic species. FLIP, FIGL1, DMC1 and  
656 RAD51 are presented as dots in green, red, blue and turquoise color, respectively.

657

658 **Figure 3:** Mutation in *FLIP* restores crossover formation in *zmm* mutants :

659 A. Schematic representation of *FLIP* (Fidgetin-Like-1 Interacting Protein). Exons appear  
660 as blue boxes, red line indicates a point mutation and red triangle represents position of  
661 T-DNA insertion.

662 B. Average number of bivalents (blue) and pairs of univalents (red) per male meiocytes  
663 at metaphase I (Figure C). Light blue represents rod shaped bivalents indicating that one  
664 chromosome arm has a at least one CO, and one arm has no CO. Dark blue represents  
665 ring shaped bivalent indicating the presence of at least one CO on both chromosome  
666 arms. The number of cells analyzed for each genotype is indicated in brackets. Data for  
667 *figl1-1*, *figl1-1 zip4*, and *zip4* was obtained from previous study <sup>10</sup>.

668 C. DAPI staining of Chromosome spreads of male meiocytes at metaphase I. Scale bars  
669 10µm.

670

671 **Figure 4** : FLIP and FIGL1 act in the same pathway to limit COs.

672 Genetic distance in centiMorgan (cM) measured by pollen tetrad analysis using  
673 fluorescent tagged lines <sup>41</sup>. I2a and I2b are adjacent intervals on chromosome 2.  
674 Similarly I3bc and I5cd on chromosome 3 and 5, respectively. Error bar indicates

675 standard error of the mean. Not significant (n.s)  $p > 0.05$  ; \*\*  $p < 0.01$  ; \*\*\*  $p < 0.001$ , Z-  
676 test. Raw data are presented in Table S3.

677

678 **Figure 5:** FLIP limits Class II COs.

679 A. Interference ratio is the ratio of the genetic size in an interval with CO in an adjacent  
680 interval divided by the genetic size of the same interval without CO in the adjacent  
681 interval. This ratio provides an estimate of the strength of CO interference. IR close to 0  
682 means strong interference; Interference ratio =1 (purple line) indicates that interference  
683 is absent. The test of absence of interference is shown in purple (n.s  $p > 0.05$  ; \*\*  $p <$   
684  $0.01$  ; \*\*\*  $p < 0.001$ ). Comparison of Interference data between the genotypes wild type  
685 and mutants is indicated in black (n.s  $p > 0.05$  ; \*  $p < 0.05$  \*\*  $p < 0.01$  ; \*\*\*  $p < 0.001$ ).

686 B. DAPI staining of Chromosome spreads of male meiocytes at metaphase I and  
687 anaphase I. Scale bars 10 $\mu$ m.

688

689 **Figure 6 :** DMC1 foci dynamics is modified in *flip-1*.

690 A. Dual immunolocalization of ZYP1 (red) and DMC1 (green) on meiotic chromosome  
691 spreads. ZYP1 marks full synapsis indicative of pachytene stage. Scale bars 10 $\mu$ m.

692 B. Quantification of DMC1 foci per cell in both genotypes. T-test \*\*\*  $p < 0.001$ . Black line  
693 indicates mean with standard deviation.

694 **Figure 7:** *FLIP* genetically interacts with *SDS*

695 A. Co-immunolocalization of ZYP1 (green) marks synapsed regions with chromosome  
696 axis protein ASY1 (red) on meiotic chromosome spreads. Synapsis was partially  
697 restored in *flip-1 sds* compared to single mutant *sds*. Scale bars 10 $\mu$ m.

698 B. Immunostaining of DMC1 (green) and chromosome axis protein ASY1 (red) on meiotic  
699 chromosome spreads.

700 C. Quantification of DMC1 foci in *sds* and *flip-1 sds* mutant. T-test \*\*\*  $p < 0.001$ . Black  
701 line indicates mean with standard deviation.

702 D. DAPI staining of Chromosome spreads of male meiocytes at metaphase I. Bivalent  
703 are restored in *flip-1sds* compared to single *sds*. Scale bars 10 $\mu$ m.

704

705

706 **Figure 8.** The FIGL1-FLIP complex interact with RAD51 and DMC1 in yeast two hybrid  
707 assays

708 A. The FRBD domain of hFIGNL1 interacts with both human RAD51 and DMC1, while  
709 hFLIP was found to interact with only DMC1. Schematic representation of full length and  
710 truncated proteins used in this interaction assays. Serial dilutions (1 to 10<sup>-3</sup>) of diploid  
711 strains expressing different fusion proteins were tested for interaction by plating on  
712 minimal media lacking different amino acids (SD-LW, SD-LWH and SD-LWHA).

713 B. The FRBD domain of Arabidopsis FIGL1 interacts with both RAD51 and DMC1. No  
714 interaction of Arabidopsis FLIP and RAD51 as well as DMC1 were detected in yeast two  
715 hybrid assays. Full-length and truncated protein used in assay are schematically

716 represented. Serial dilutions of diploids were tested on selection media, as mention  
717 above.

718

719 **Figure 9. Model: The FLIP-FIGL1 complex controls strand invasion by negatively**  
720 **regulating RAD51/DMC1.**

721

722 Table S1. TAP-MS data

723 Table S2. NCBI and JGI gene entries of figure 2.

724 Table S3. Raw FTL data

725 Table S4. Genotyping Primers

Figure. 1

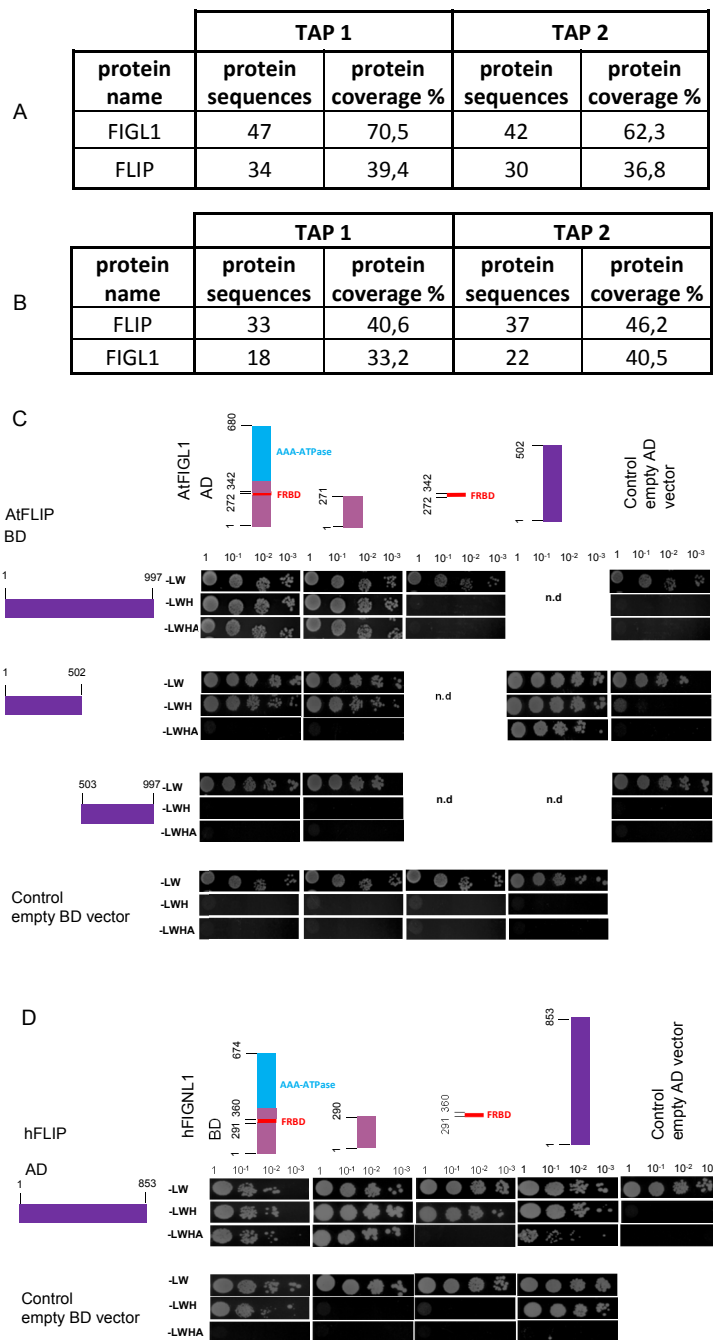

**Figure 1:** *Arabidopsis* and Humans FLIP and FIGL1 interact with each other through N-terminal .

A-B. Represents purified proteins in two replicates of tandem affinity purifications followed by mass spectrometry, performed using *Arabidopsis* FIGL1 (A) or FLIP (B) as a bait, over-expressed in *Arabidopsis* cultured cells. For filtering aspecific and false positive interactors, we refer to M&M and <sup>34</sup>. The number of peptides and the fraction of the protein covered are indicated for each hit. Detailed information is present in Table S1.

C. *Arabidopsis* FLIP-FIGL1 interact using yeast two hybrid assay. Schematic representation of full length and truncated proteins. Position of the truncation and the known domain are indicated. The two protein of interest are fused with GAL4 DNA binding domain (BD) and with GAL4 activation domain (AD), respectively. Diploid strains are selected on medium lacking LW amino acids. Protein interactions were observed by selecting diploids grown on medium stringency media lacking LWH or in high stringency medium lacking LWHA. Controls empty AD and BD vector are shown. Serial dilutions are indicated in the order 1, 10, 100, 1000. Combinations of fusion proteins not tested are indicated as not determined (n.d).

D. Humans FLIP-FIGL1 interact in yeast two hybrid assay. Legend as in C.

Figure 2.

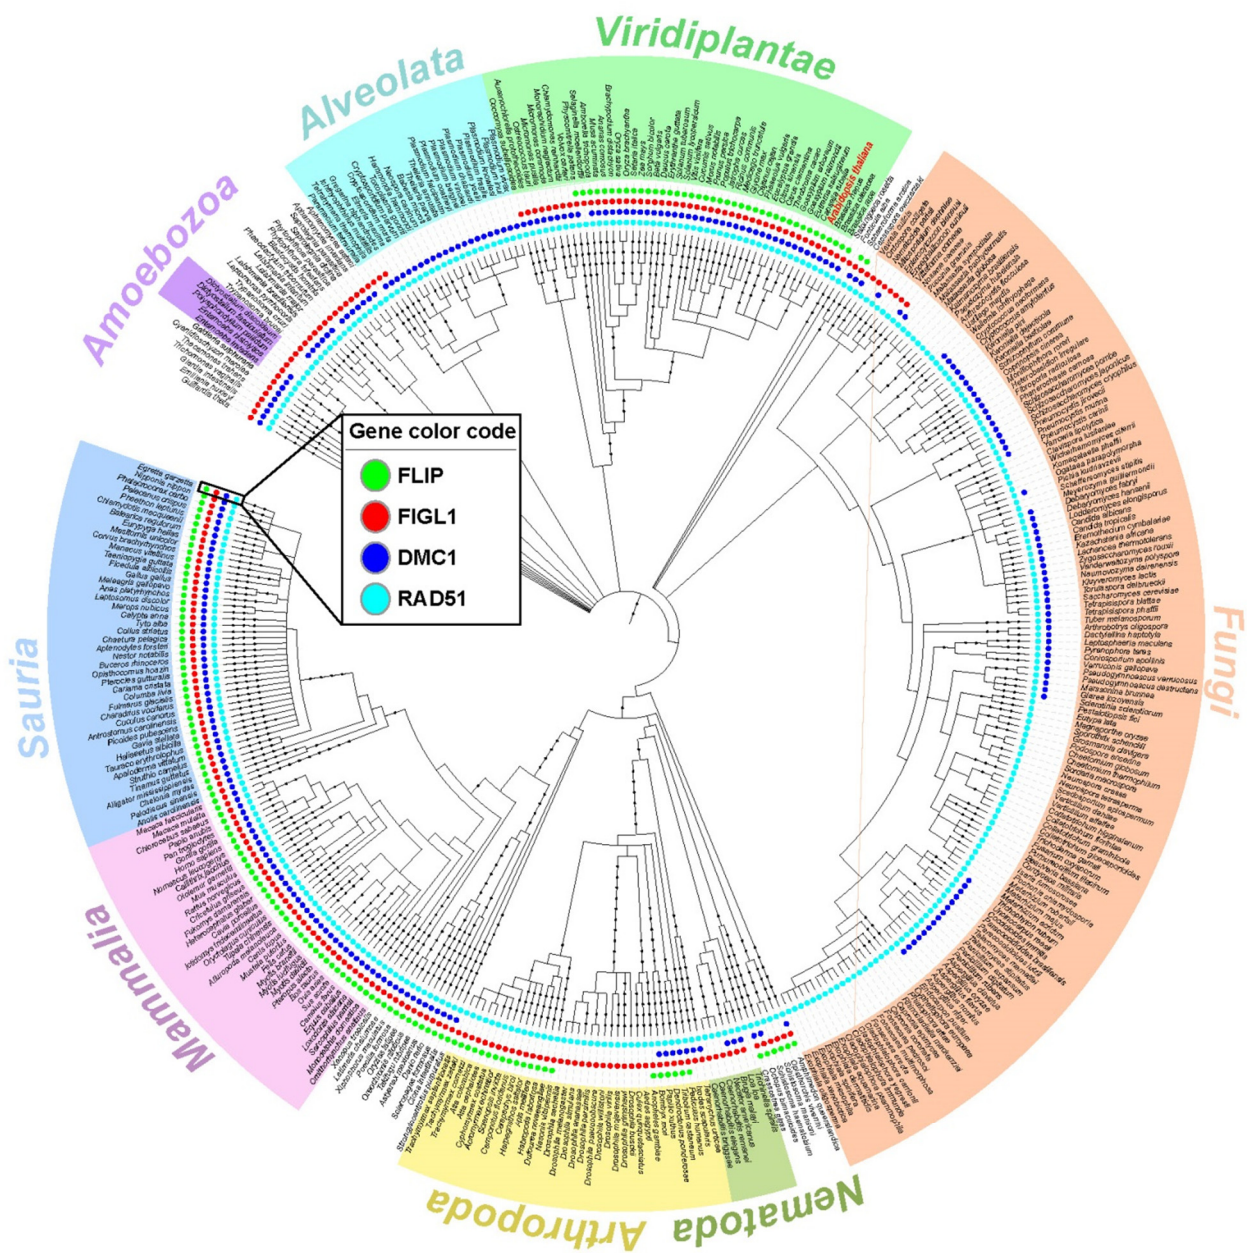

**Figure 2.** Phylogenetic tree depicting the evolutionary conservation of FLIP, FIGL1, RAD51 and DMC1 orthologs in a range of eukaryotic species. FLIP, FIGL1, DMC1 and RAD51 are presented as dots in green, red, blue and turquoise color, respectively.



Figure 3.

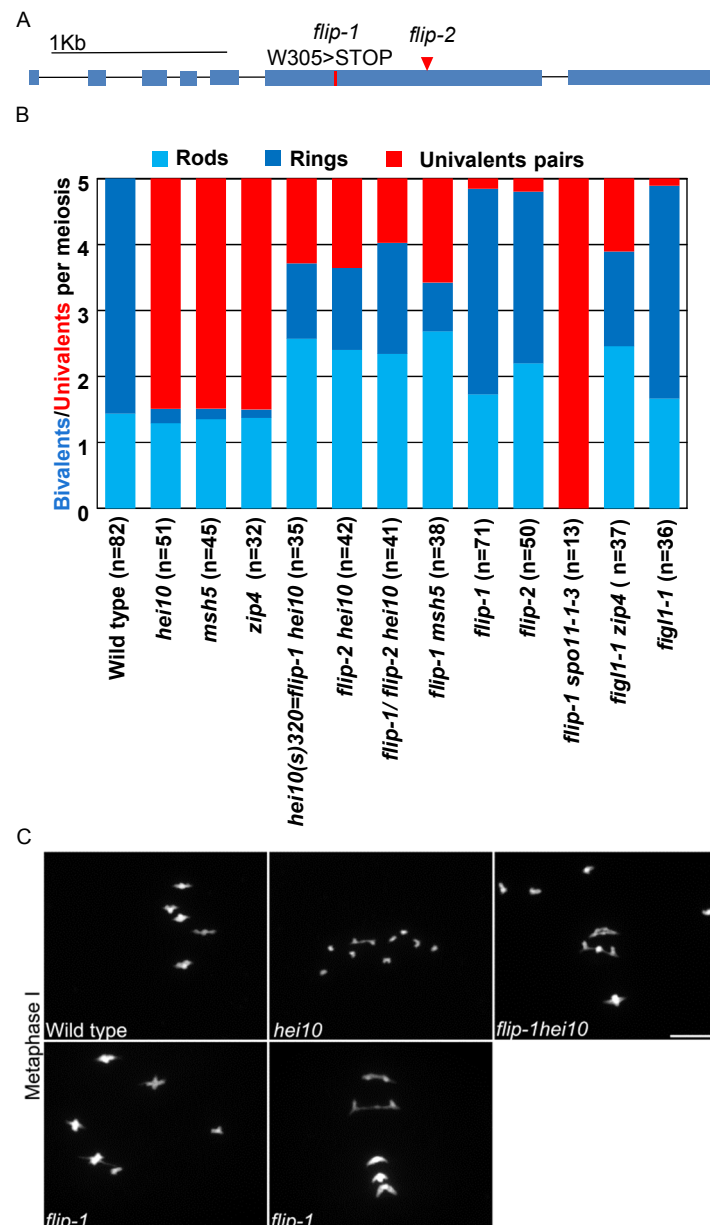

**Figure 3:** Mutation in *FLIP* restores crossover formation in *zmm* mutants :

A. Schematic representation of *FLIP* (Fidgetin-Like-1 Interacting Protein). Exons appear as blue boxes, red line indicates a point mutation and red triangle represents position of T-DNA insertion.

B. Average number of bivalents (blue) and pairs of univalents (red) per male meicytes at metaphase I (Figure C). Light blue represents rod shaped bivalents indicating that one chromosome arm has a at least one CO, and one arm has no CO. Dark blue represents ring shaped bivalent indicating the presence of at least one CO on both chromosome arms. The number of cells analyzed for each genotype is indicated in brackets. Data for *figl1-1*, *figl1-1 zip4*, and *zip4* was obtained from previous study<sup>10</sup>.

C. DAPI staining of Chromosome spreads of male meicytes at metaphase I. Scale bars 10 $\mu$ m.



Figure. 4

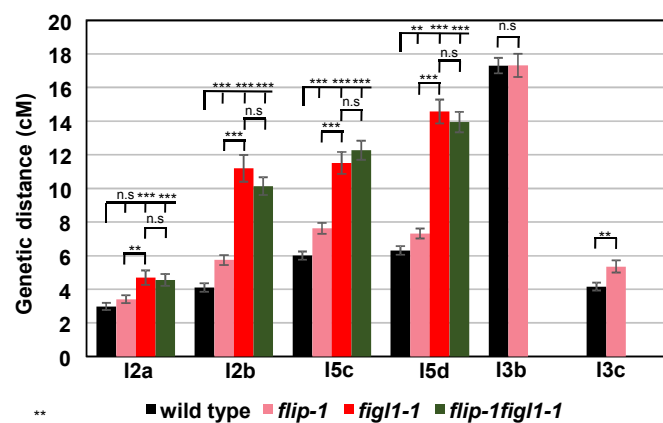

**Figure 4** : FLIP and FIGL1 act in the same pathway to limit COs.

Genetic distance in centiMorgan (cM) measured by pollen tetrad analysis using fluorescent tagged lines<sup>41</sup>. I2a and I2b are adjacent intervals on chromosome 2. Similarly I3bc and I5cd on chromosome 3 and 5, respectively. Error bar indicates standard error of the mean. Not significant (n.s)  $p > 0.05$  ; \*\*  $p < 0.01$  ; \*\*\*  $p < 0.001$ , Z-test. Raw data are presented in Table S3.

Figure. 5

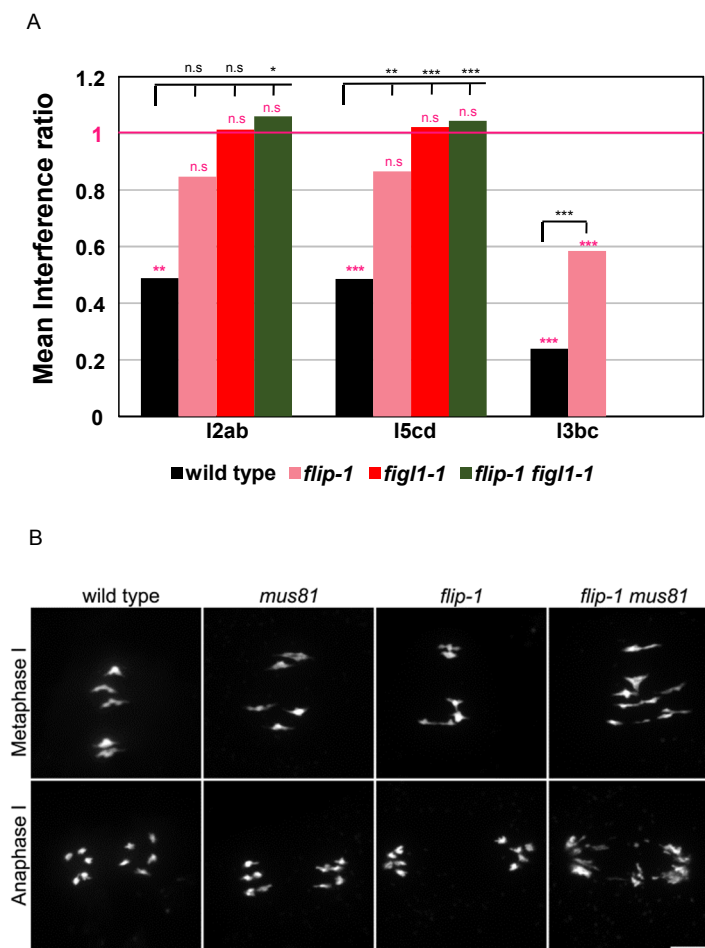

**Figure 5:** FLIP limits Class II COs.

A. Interference ratio is the ratio of the genetic size in an interval with CO in an adjacent interval divided by the genetic size of the same interval without CO in the adjacent interval. This ratio provides an estimate of the strength of CO interference. IR close to 0 means strong interference; Interference ratio =1 (purple line) indicates that interference is absent. The test of absence of interference is shown in purple (n.s  $p > 0.05$  ; \*\*  $p < 0.01$  ; \*\*\*  $p < 0.001$ ). Comparison of Interference data between the genotypes wild type and mutants is indicated in black (n.s  $p > 0.05$  ; \*  $p < 0.05$  \*\*  $p < 0.01$  ; \*\*\*  $p < 0.001$ ).

B. DAPI staining of Chromosome spreads of male meiocytes at metaphase I and anaphase I. Scale bars 10 $\mu$ m.

## Figure. 6

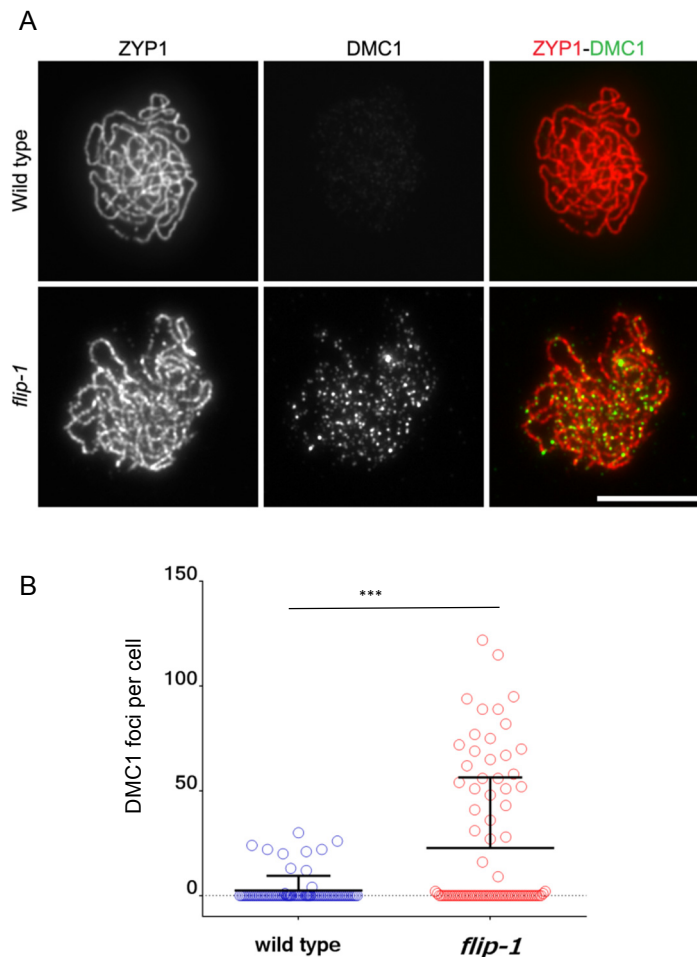

**Figure 6:** DMC1 foci dynamics is modified in *flip-1*.

A. Dual immunolocalization of ZYP1 (red) and DMC1 (green) on meiotic chromosome spreads. ZYP1 marks full synapsis indicative of pachytene stage. Scale bars 10 $\mu$ m.

B. Quantification of DMC1 foci per cell in both genotypes. T-test \*\*\*  $p < 0.001$ . Black line indicates mean with standard deviation.

Figure. 7

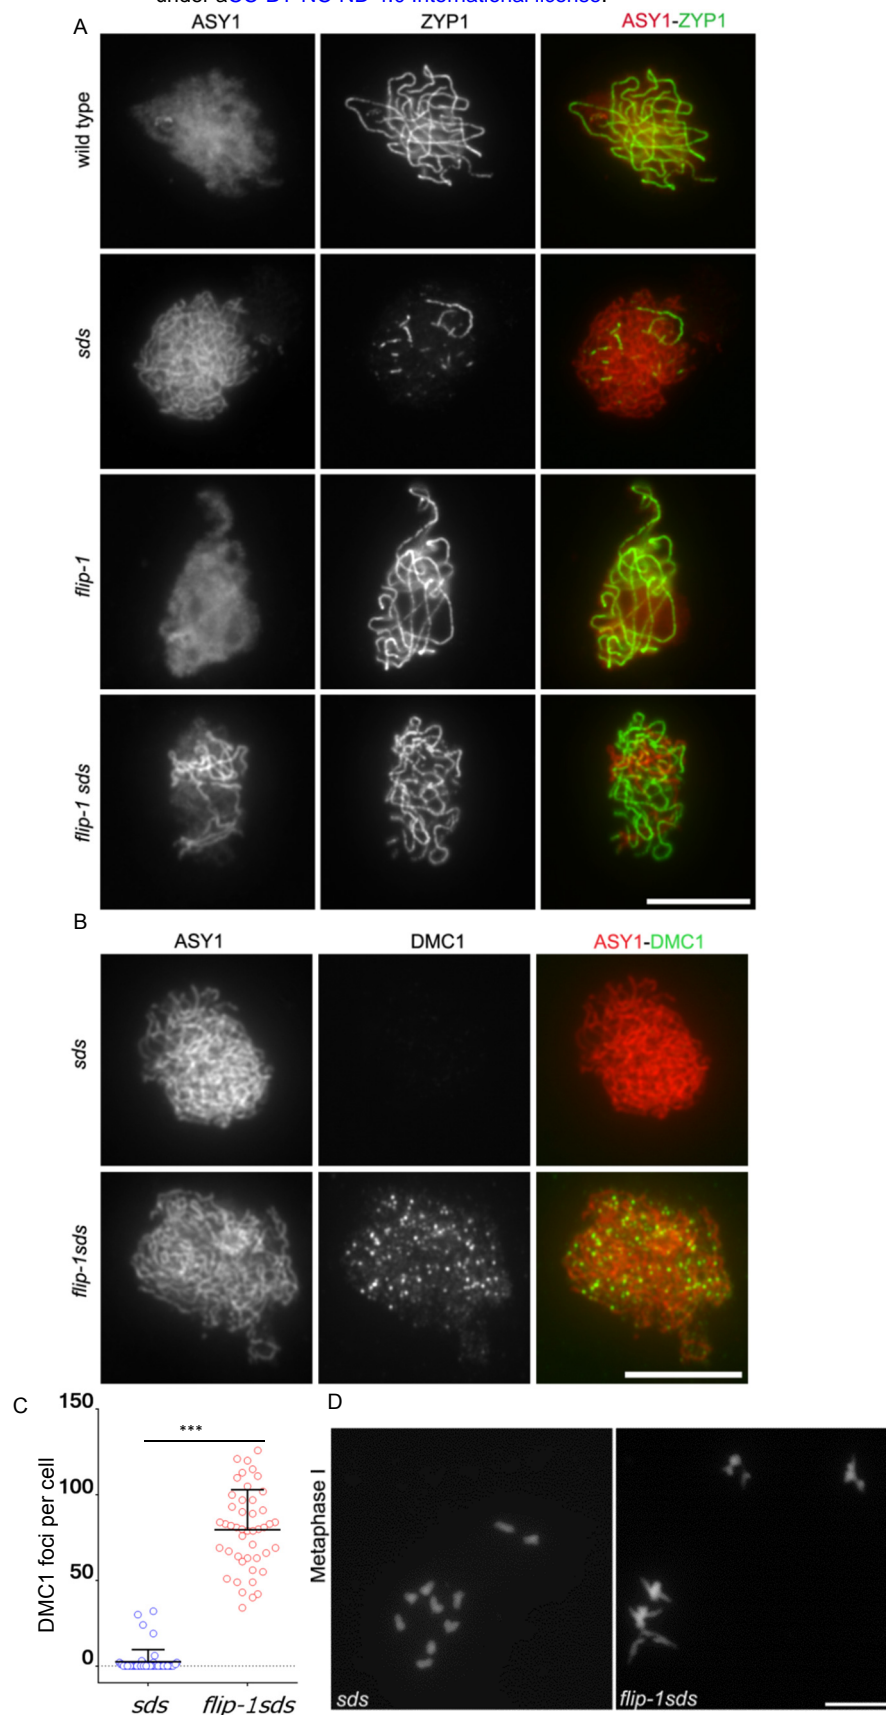

**Figure 7: FLIP genetically interacts with SDS**

A. Co-immunolocalization of ZYP1 (green) marks synapsed regions with chromosome axis protein ASY1 (red) on meiotic chromosome spreads. Synapsis was partially restored in *flip-1 sds* compared to single mutant *sds*. Scale bars 10 $\mu$ m.

B. Immunostaining of DMC1 (green) and chromosome axis protein ASY1 (red) on meiotic chromosome spreads.

C. Quantification of DMC1 foci in *sds* and *flip-1 sds* mutant. T-test \*\*\*  $p < 0.001$ . Black line indicates mean with standard deviation.

D. DAPI staining of Chromosome spreads of male meiocytes at metaphase I. Bivalent are restored in *flip-1 sds* compared to single *sds*. Scale bars 10 $\mu$ m.

## Figure 8

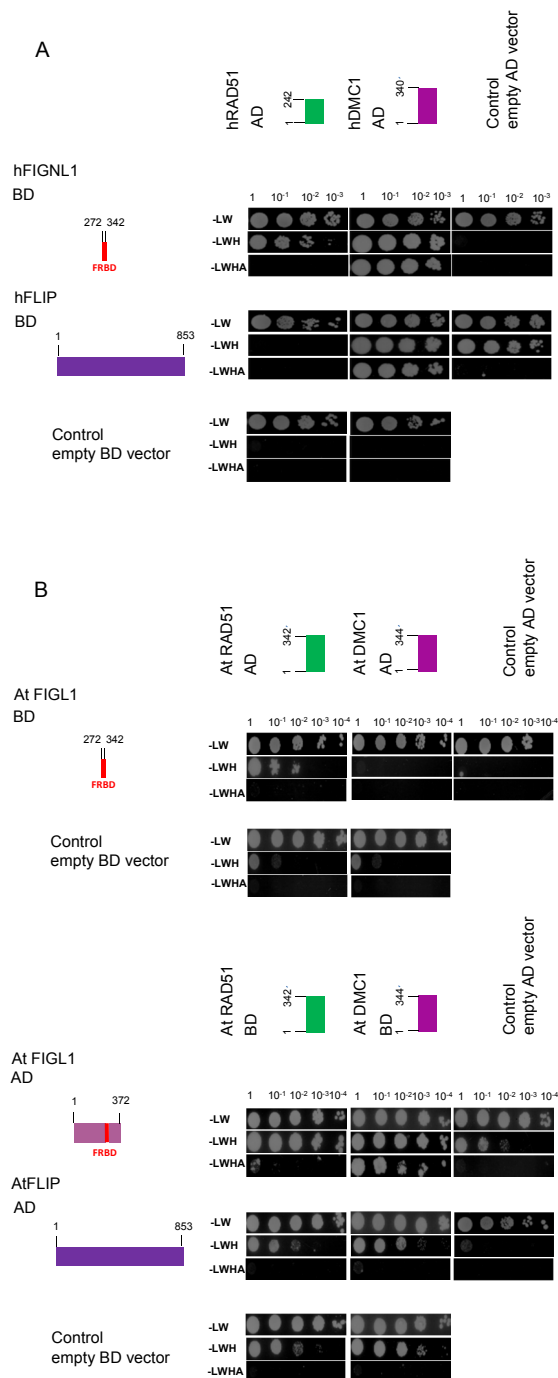

**Figure 8.** The FIGL1-FLIP complex interact with RAD51 and DMC1 in yeast two hybrid assays

A. The FRBD domain of hFIGL1 interacts with both human RAD51 and DMC1, while hFLIP was found to interact with only DMC1. Schematic representation of full length and truncated proteins used in this interaction assays. Serial dilutions (1 to  $10^{-3}$ ) of diploid strains expressing different fusion proteins were tested for interaction by plating on minimal media lacking different amino acids (SD-LW, SD-LWH and SD-LWHA).

B. The FRBD domain of Arabidopsis FIGL1 interacts with both RAD51 and DMC1. No interaction of Arabidopsis FLIP and RAD51 as well as DMC1 were detected in yeast two hybrid assays. Full-length and truncated protein used in assay are schematically represented. Serial dilutions of diploids were tested on selection media, as mention above.

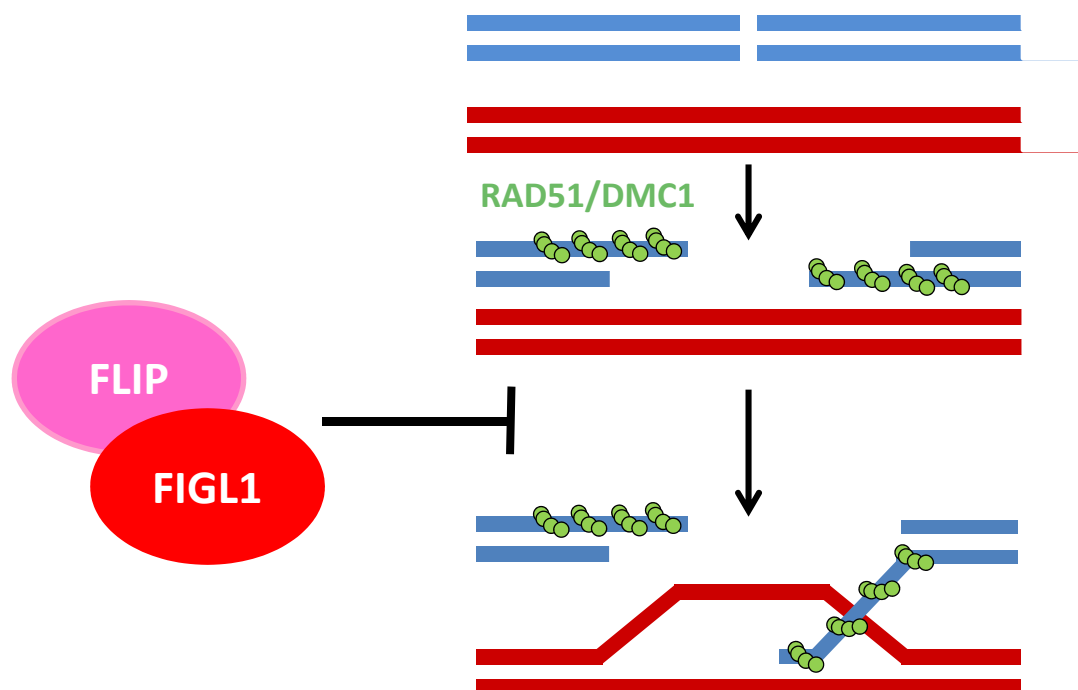

**Figure 9. Model: The FLIP-FIGL1 complex controls strand invasion by negatively regulating RAD51/DMC1.**
